# Supplementary material
Source: publisher figshare collection journal article supplement (https://diabetesjournals.figshare.com/ndownloader/files/31065976)
Supplement: Supplementary file 1 [file 31065976]

**Supplement Table 1. The sequences of qPCR primers**

| <b>Primers</b> | <b>Sequence (5'-3')</b>  |
|----------------|--------------------------|
| cKO-F          | GAGAATCTGGACTTGTTGCTGG   |
| cKO-R          | GCTGTGGTCTGAATTCTGGAAAAG |
| CASK-F         | AAGGAGAAAACATAAGGGTGC    |
| CASK-R         | GGAGGTAGGGTCTTCGGAG      |
| PDX1-F         | CCCCAGTTTACAAGCTCGCT     |
| PDX1-R         | CTCGGTTCCATTCGGGAAAGG    |
| NeuroD-F       | ATGACCAAATCATACAGCGAGAG  |
| NeuroD-R       | TCTGCCTCGTGTTCTCTCGT     |
| Mafa-F         | AGGAGGAGGTCATCCGACTG     |
| Mafa-R         | CTTCTCGCTCTCCAGAATGTG    |
| Mint1-F        | GGTGCTGAGTCATCAAGCATAC   |
| Mint1-R        | GAAGTTCAACGTAGGTTGGGAA   |
| Munc 18-F      | GTGGACCAGTTAAGCATGAGG    |
| Munc 18-R      | GCTCTCGGCGCTTGTTGAT      |
| SNAP-25-F      | CAACTGGAACGCATTGAGGAA    |
| SNAP-25-R      | GGCCACTACTCCATCCTGATTAT  |
| Syntaxin-1-F   | AGAGATCCGGGGCTTTATTGA    |
| Syntaxin-1-R   | AATGCTCTTTAGCTTGGAGCG    |
| VAMP-F         | GCTGGATGACCGTGCAGAT      |
| VAMP-R         | GATGGCGCAGATCACTCCC      |

|         |                         |
|---------|-------------------------|
| GAPDH-F | AGGTCGGTGTGAACGGATTTG   |
| GAPDH-R | TGTAGACCATGTAGTTGAGGTCA |

Notes: cKO: the primers were designed within exon 6 of *Cask* gene.

**Supplementary Table 2. Antibodies for western blot assay used in the experiments.**

| Name                          | Manufacturer                                  | Dilution |
|-------------------------------|-----------------------------------------------|----------|
| Anti-CASK                     | Santa Cruz Biotechnology, Santa Cruz, CA, USA | 1:1000   |
| Anti-IRS1                     | Cell Signaling Technology, Danvers, MA, USA   | 1:1000   |
| Anti-phospho-IRS1 (Ser 636)   | Cell Signaling Technology, Danvers, MA, USA   | 1:1000   |
| Anti-AKT                      | Cell Signaling Technology, Danvers, MA, USA   | 1:1000   |
| Anti-phospho-AKT (Ser 473)    | Cell Signaling Technology, Danvers, MA, USA   | 1:2000   |
| Anti-mTOR                     | Abcam, Cambridge, UK                          | 1:1000   |
| Anti-phospho-mTOR (Ser2448)   | Abcam, Cambridge, UK                          | 1:1000   |
| Anti-p70S6K                   | Abcam, Cambridge, UK                          | 1:1000   |
| Anti-phospho-p70S6K (Ser 424) | Abcam, Cambridge, UK                          | 1:1000   |
| Anti-GAPDH                    | Cell Signaling Technology, Danvers, MA, USA   | 1:1000   |
| Anti- $\beta$ -Actin          | Cell Signaling Technology, Danvers, MA, USA   | 1:1000   |

## Supplementary Figure 1

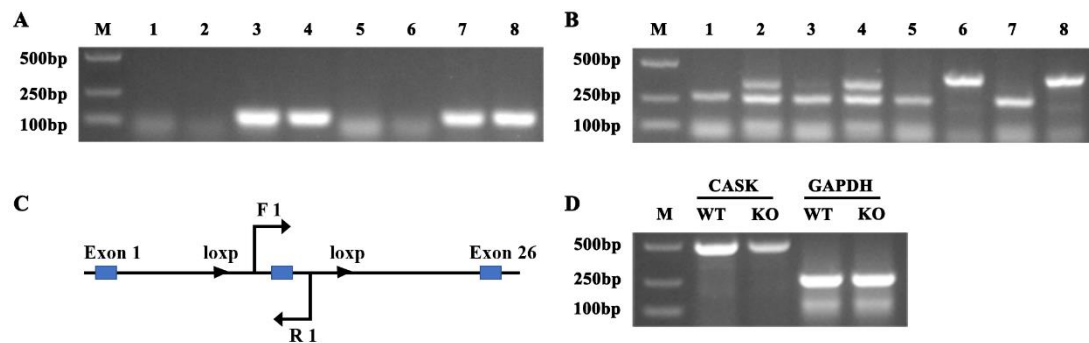

### Representative PCR results for the genotyping identification

(A-B) Identification of the Cre recombinase transgene and LoxP sites in mice. (A) Lanes 1, 2, 5, 6: mice did not carry the Cre recombinase transgene; Lanes 3, 4, 7, 8: mice carried the Cre recombinase transgene. (B) Lanes 1,3,5,7: mice did not insert the LoxP site; Lanes 2,4: CASK<sup>fl/-</sup> heterozygous mice; Lanes 6,8: CASK<sup>fl/fl</sup> mice. (C) Identification of the efficient removal of exon 6 in CASK gene of mouse pancreatic islets by PCR assay. Primers were designed to recognize the region inside of LoxP sites and both sides of exon 6. The primers for the *Cask* as follow: F1: GTAGGAGTCTCCACTTTGTGAGTC; R1: CTTCAGAGTCTCCGGGTAGTTTTTC. The primers for the *Gapdh* as follow: F: GGAGAGATCTGGTTTCTGGAGGATG; R: CCCCAGAGGTAGTTATGGCGTAGTG. (D) The results showed that in comparison with WT mice, the PCR products (exon 6 in *Cask* gene) in the islets of  $\beta$ CASKKO mice were significantly decreased. The residual bands should be from non- $\beta$  cells in the islets.

## Supplementary Figure 2

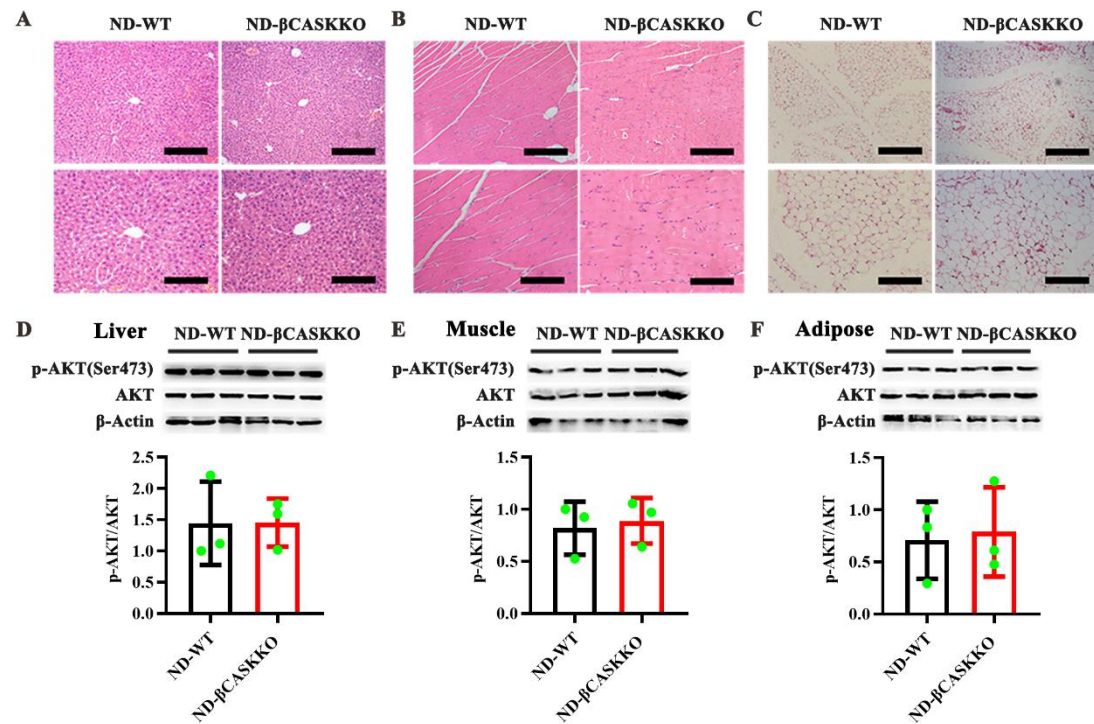

**ND-βCASKKO mice do not show effects on insulin signaling in liver, skeletal muscle, and epididymal adipose tissue**

(A-C) Representative H&E staining of the liver (A), skeletal muscle (B), and epididymal adipose tissue (C) from ND-WT and ND-βCASKKO mice. Scale bars: (upper) 200 μm; (lower) 100 μm. (D-F) Western blot analysis of the phosphorylation level of AKT in the liver (D), skeletal muscle (E), and epididymal adipose tissue (F) of mice after insulin treatment. Protein levels were normalized to the β-actin level. The intensity of the protein bands is indicated below the respective bands. n=3.

### Supplementary Figure 3

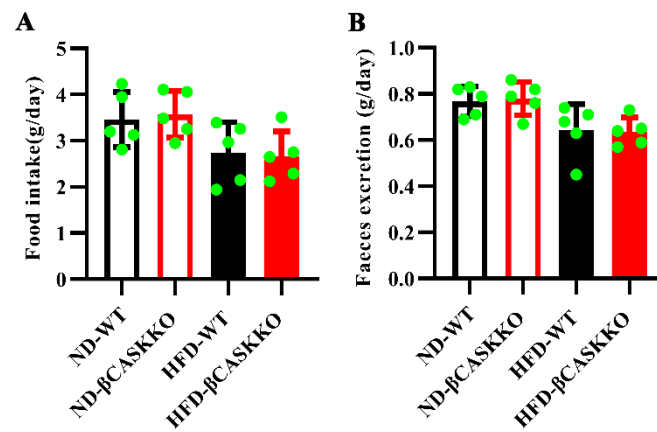

### Metabolic cage study of mice after HFD for 16 weeks

(A-B) The average day food intake (A) and feces excretion (B) of mice after ND or HFD feeding for 16 weeks. n=5.

## Supplementary Figure 4

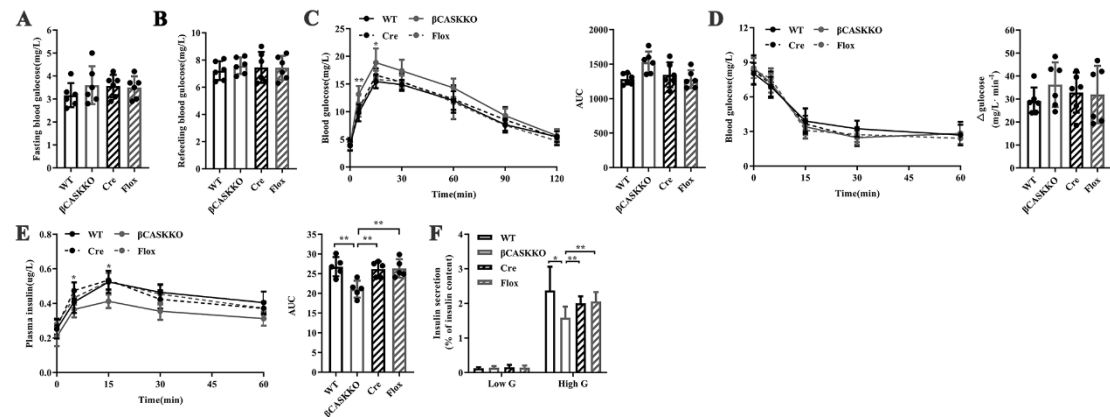

## Glucose metabolism phenotype in female mice

(A-B) Fasting (A) and postprandial (B) blood glucose levels of βCASKKO and WT mice. (C) IPGTT assays were performed on 16-week-old mice. The AUC is shown on the right. n=6, \* P<0.05, \*\* P<0.01. (D) IPITT assays were performed on 16-week-old mice. The rate of decline in glucose between 0 and 15 min is shown on the right. n=6. (E) GSIS assays were performed in mice. n=5, \* P<0.05, \*\* P<0.01. AUC is shown on the right. (F) Pancreatic islets were separated to perform a GSIS. Insulin release in response to glucose stimulation was calculated as a percentage of insulin content. n=8. \* P<0.05, \*\* P<0.01. These results showed that βCASKKO mice decreased insulin secretion upon glucose stimulation.

## Supplementary Figure 5

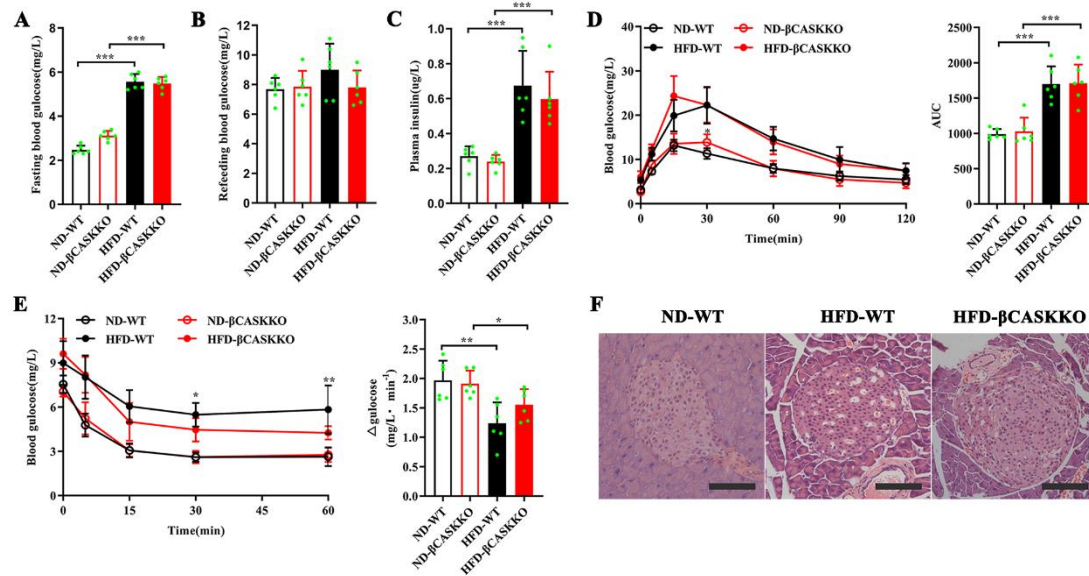

## Glucose metabolism phenotype in HFD mice fed the HFD for 8 weeks

(A-C) Fasting (A) and postprandial (B) blood glucose levels and fasting serum insulin level (C) of WT and  $\beta$ CASKKO mice for HFD and ND.  $n=6$ . \*\*\* $P<0.001$ . (D-E) Glucose tolerance test (D) and insulin tolerance test (E) assays were conducted in HFD and ND mice after 8 weeks of ND or HFD feeding.  $n=6$ . \*  $P<0.05$ , \*\*  $P<0.01$ , WT vs.  $\beta$ CASKKO. The AUC or the rate of decline in glucose between 0 and 15 min is shown on the right side of the corresponding curve. \*  $P<0.05$ , \*\*  $P<0.01$ , \*\*\*  $P<0.001$ . (F) Representative H&E images of the pancreas showed enlarged islets in HFD mice. Scale bars: 100  $\mu$ m. These results showed that after 8 weeks of HFD feeding, HFD-WT mice and HFD- $\beta$ CASKKO mice showed less difference in glucose homeostasis and insulin sensitivity.

## Supplementary Figure 6

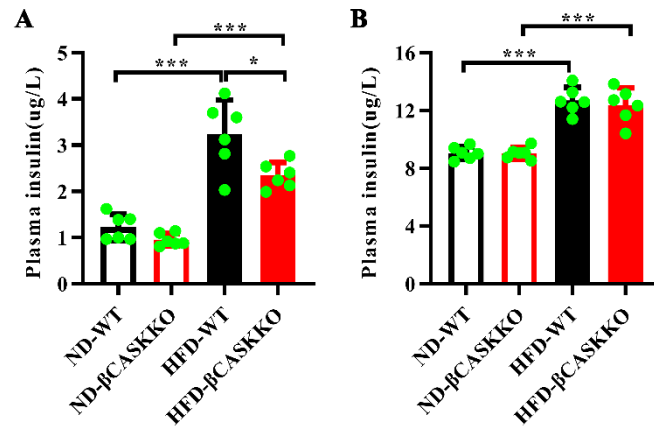

**Determination of serum insulin levels before and after injection of 1 U insulin/kg body weight in 4 h fasted mice during insulin tolerance test**

**(A-B)** Serum insulin level in fasted **(A)** or 15 min **(B)** after insulin injection. n=6, \*\*P<0.005, \*\*\*P<0.001. These results showed that the circulating insulin level 15 min after insulin injection between WT and KO mice was approximately equal in both ND and HFD-treated group.

## Supplementary Figure 7

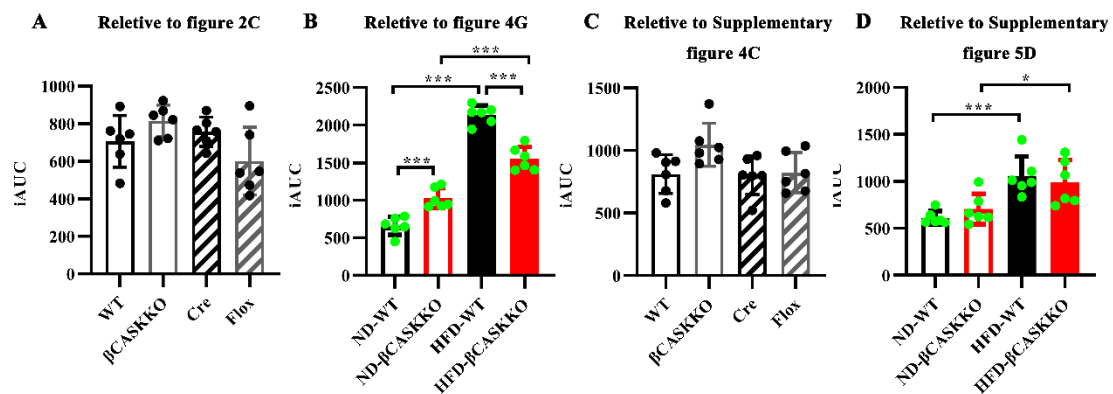

**The iAUC values for IPGTT**

**(A-C)** The iAUC related to **Figure 2C (A)**, **Figure 4G (B)**, **Supplementary Figure 4C (C)**, and **Supplementary Figure 5D.**



Supplementary Figure 8

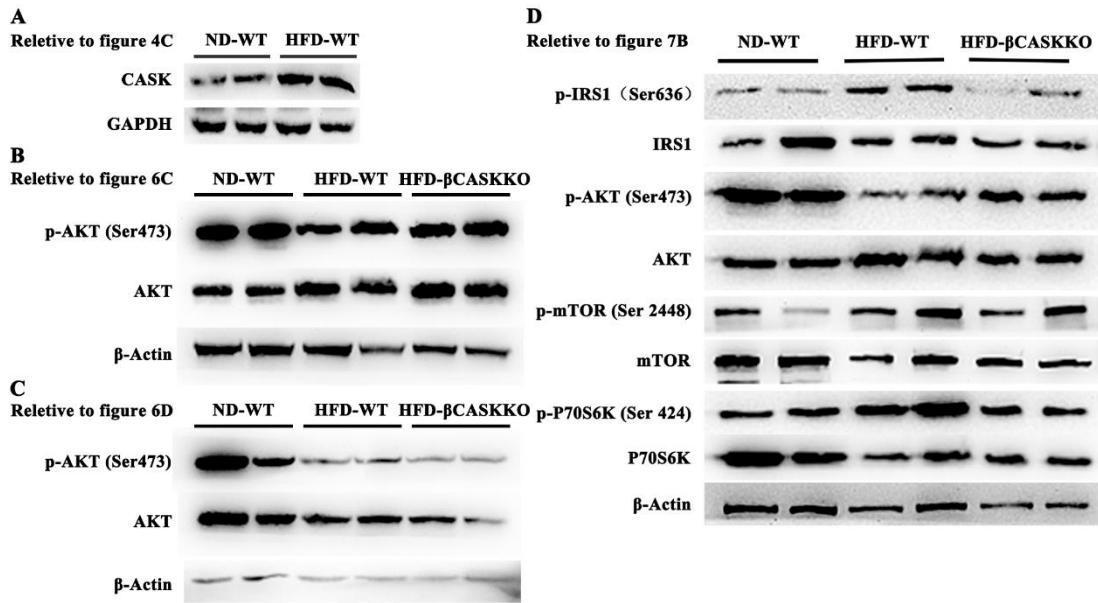

Western blot analyses of protein

(A) Western blot analyses of CASK and GAPDH in islets from ND-WT and HFD-WT mice, related to **Figure 4C** in the article. n=4 mice/group. (B-C) Western blot analyses of the phosphorylation level of AKT in the liver (B) and muscle tissue (C) of mice 15 min after insulin treatment, related to **Figure 6C-D** in the manuscript, respectively. (D) Western blot analyses of the phosphorylation level of IRS1, AKT, mTOR, and S6K1 in the adipose of mice 15 min after insulin treatment, related to **Figure 7B** in the manuscript.
